# Supplementary material for: Investigating the importance of sub-grid particle formation in point sourceplumes over eastern China using IAP-AACM with a sub-grid parameterization
Source: Copernicus journal article supplement (doi:10.5194/gmd-2020-430), 2021-01-26
Supplement: Supplementary file [file gmd-2020-430-AC3-supplement.pdf]

**We thank the reviewer for the effort to review the manuscript and to provide constructive comments and good suggestions to improve our manuscript. Our replies to the comments and our actions taken to revise the paper (in blue) are given below (the original comments are copied here).**

The modifications corresponding to the comments and the revised language and grammars in the manuscript are marked in red color.

Referees' comments:

Referee #1

Oxidation process of SO<sub>2</sub> to sulfate is a key factor influence atmospheric aerosol particle chemical composition, size distribution, new formation. This can largely impact the hygroscopicity and available cloud condensation nuclei in the atmosphere and therefore lead to impacts on atmospheric chemical processes and climate. However, this process is usually with a scale much less than regional or climate models' resolution, and the sub-grid oxidation process could be an important source of uncertainty and hamper our better understanding in air pollution and climate. This study took a further step, by including a sub-grid scheme to describe this sub-grid process in a global-regional model to quantify the uncertainty introduced by sub-grid oxidation of SO<sub>2</sub> and improve the model performance. I think this is a good piece of work and well fit the scope of GMD, in terms of science. But, I also notice there are many typos and ambiguous statements in the manuscript. I would like to suggest more attention and carefulness on the language and presentation. In general, I believe this work is worth for publishing in GMD after some minor corrections and careful language editing.

Reply: Thanks to the reviewer for detailed review and good suggestions to improve our work.

Specific comments:

1) end of page-2, coal burning in China contribute 80% SO<sub>2</sub> emission. Do you mean 80% of china total emissions or global emissions? And, at nowadays, SO<sub>2</sub> emission in China has effectively reduced due to the great success of green energy policy of China.

But India surpasses the emission of China and tops the SO<sub>2</sub> emissions (Li et al., 2017). This point also worth to comment on.

Reply: "coal burning in China contribute 80% SO<sub>2</sub> emission " means coal burning contribute 80% to SO<sub>2</sub> emission in China. As pointed out by the reviewer, in China, SO<sub>2</sub> emissions have been effectively reduced due to the desulfuration measures and reduction policies. However, the coal burning is still the major SO<sub>2</sub> sources. On the other hand, the SO<sub>2</sub> emissions of India has surpassed that of China. So the study of sub-grid parameterization on point source can also help to make sense of the air pollution problem in India reported in recent studies (Chen et al., 2020). Some references on SO<sub>2</sub> emissions and air pollution in India were added and the sentences about this issue have been made more clear to avoid misunderstanding (see in Line 57-62 and Line 649-650).

*Chen, Y., Wild, O., Ryan, E., Sahu, S.K., Beig, G.J.A.C., Physics, 2020. Mitigation of PM<sub>2.5</sub> and ozone pollution in Delhi: a sensitivity study during the pre-monsoon period. 20, 499-514.*

2) line 64-66, please double check the chemical equation. I believe it is OH radical, rather than anion. It would be better to explain that why the concentration NO<sub>x</sub> and VOCs will affect the oxidation of SO<sub>2</sub>.

Reply: Yes, OH is radical rather than anion. The chemical equation is revised to " $2\text{OH} + \text{SO}_2 \rightarrow \text{H}_2\text{SO}_4$ ". The concentration of NO<sub>x</sub> and VOCs can influence the atmospheric oxidation through gas-phase chemical reactions and thus the OH concentration and the oxidation of SO<sub>2</sub>. According to this good comment, the explanation is added (see in Line 64-66).

3) lots of typos, here are some examples, but I believe there are many more. Please carefully check the manuscript. Line-71, primary? I think should be 'secondary'?; line 93-94: tens of seconds of kilometers, I do not understand here; 'caoncentration'; line 279: 'imparct', etc...

Reply: As the process of H<sub>2</sub>SO<sub>4</sub> nucleating to form new particles in the plume is much faster than the formation through the gas-phase reaction in the atmosphere, the new formed sulfate is named as 'primary' (Luo and Yu, 2011). 'caoncentration' should be 'concentration'. 'imparct' should be 'impact'. Other typos have also been carefully revised (seen in line 98, 286, 405, 455, 536, 585, etc.).

*Luo, G. and Yu, F.: Sensitivity of global cloud condensation nuclei concentrations to primary sulfate emission parameterizations, Atmospheric Chemistry and Physics, 11, 1949-1959, 2011.*

4) please provide the units for all variables in your Eq. 1-6. And you have two equation 5 and 6. What is DSWRF in your Eq. 6? Downward shortwave at TOA or surface?

Reply: The units for all variables in Eq. 1-6 are provided except dimensionless variables (e.g., P1 and P2) (see in Line 237, 239 and 265). The numbers of equations are revised in Line 264 and 268. DSWRF is the downward shortwave radiative flux from the WRF model. The explanation of DSWRF is shown in Line 209.

5) in the P6 scheme, 'x' is calculated as a function of [NO<sub>x</sub>] depend on high/low-VOC regime. In a very intensive plume, high concentration of fresh emitted NO<sub>x</sub> would deplete oxidants. Would you please make some comments on this, and discuss how could this effect influence the results.

Reply: The depletion of oxidants in the high NO<sub>x</sub> concentration plume is considered in the SGPF scheme. As shown in Fig. 1, the OH concentration decreases as the NO<sub>x</sub> concentration increases when the NO<sub>x</sub> concentration is higher than ~5ppb in the localized curve. The OH concentration falls to  $\sim 2 \times 10^6 \text{ cm}^{-3}$  when NO<sub>x</sub> concentration is higher than 30 ppb. Before localization, the OH is depleted more when the NO<sub>x</sub> is high. The NO<sub>x</sub>-OH curve without localization fits to the atmospheric condition in Europe and America. However, the NO<sub>x</sub> and OH concentration are much higher in the atmosphere of China. Therefore, we adjusted the variation curve of OH concentration with respect to the NO<sub>x</sub> concentration in the plume based on the surface observations. Obviously, there are uncertainties in this parameterization. The variation curve can be further updated when observations in the plume are available. Some comments have been added in Line 315-325.

6) line 300, I do not quite understand there. Why OH is in the range of (1-8)\*1e6, but with a peak of 2.7\*1e6? Should the peak of 8\*1e6? I could be lost in somewhere, please help make it clear.

Reply: The observed daily maximum OH concentrations is in the range of  $(1-8) \times 10^6 \text{ cm}^{-3}$  and the averaged daytime peak is  $2.7 \times 10^6 \text{ cm}^{-3}$  over the whole observation period. It has been revised in Line 308.

7) section 2.4. The outer domain of your model is a global domain. But, as I understood, WRF is a regional model. How could a regional model drive a global domain?

Reply: Yes, WRF is more widely used in regional simulations. However, WRF also support global simulation applications (Zhang et al., 2012). The reference of global WRF is added in the revised manuscript in Line 328.

*Zhang, Y., Hemperly, J., Meskhidze, N., and Skamarock, W. C.: The Global Weather Research and Forecasting (GWRf) Model: Model Evaluation, Sensitivity Study, and Future Year Simulation, Atmospheric and Climate Sciences, 02, 231-253, 10.4236/acs.2012.23024, 2012.*

8) Would you please comments on that why the performance in Beijing warm season is worse in P6 scheme?

Reply: It should be related to the poor simulation of wind field in Beijing in warm seasons. As shown in Table 3, the correlation coefficients of both U wind and V wind of Beijing is much lower in warm season (0.06 and 0.19) than in cold season (0.60 and 0.52). Moreover, the correlation coefficients of wind speed in warm season is more than 50% lower than in cold season. The simulation of wind will directly affect the diffusion and transportation of air pollutants. Some comments are added in Line 393-395

9) line 648-650. ARI contributed to a 7.8% increase in near-surface PM<sub>2.5</sub>, while API suppressed secondary aerosol formation to a 3% decrease of PM<sub>2.5</sub>. I do not understand here. First, what is API? Second, why suppress the secondary formation but contribute to a 7.8% increase in PM<sub>2.5</sub>.

Reply: API and ARI mean the aerosol–photolysis interaction and aerosol-radiation interaction, respectively. As ARI increases atmospheric stability, it contributed to a 7.8% increase in near-surface PM<sub>2.5</sub> according to the experiments conducted by Wu et al. (2020). However, API suppressed secondary aerosol formation to a 3% decrease of PM<sub>2.5</sub>. The description of the impacts of ARI and API on PM<sub>2.5</sub> concentrations here is to estimate the impact of not containing aerosol feedback on our results.

10) figure quality is not good, especially figure 7 and 5.

Reply: Figure 5 and 7 have been rearranged to make them more clear. However, the sharpness of the figures pasted into the document is not satisfactory due to the large

number of subgraphs. We will submit \*.eps images separately later.

Reference:

Li, C., McLinden, C., Fioletov, V. et al. India Is Overtaking China as the World's Largest Emitter of Anthropogenic Sulfur Dioxide. *Sci Rep* **7**, 14304 (2017).  
<https://doi.org/10.1038/s41598-017-14639-8>
